# Supplementary material for: Association study for drought tolerance of flint maize inbred lines using SSR markers
Source: Research Square preprint supplement (doi:10.21203/rs.3.rs-1411603/v1), 2022-03-24
Supplement: Supplementary file 1 [file c8467dd2a87d5be271ebd225.xlsx]

## Sheet: Supplementary Table 2
Trait	Marker	marker_p
Drought Tolerance	umc2400	0.0240082
Drought Tolerance	umc2378	0.0477139
Drought Tolerance	umc1872	0.00859543
Drought Tolerance	bnlg2046	0.0192557
Drought Tolerance	umc1969	0.0240082
Drought Tolerance	bnlg1126	0.027
Drought Tolerance	umc2334	0.0441942
Drought Tolerance	phi022	0.0441942
Drought Tolerance	umc1088	6.35157e-08
Drought Tolerance	umc1707	0.0110334
Drought Tolerance	bnlg1117	0.0248799
Drought Tolerance	umc1716	0.0161909
LA	umc1503	0.0452061
LA	umc1868	0.0105889
LA	umc2287	0.0261177
LA	bnlg1784	0.0398924
LA	umc2334	0.0279939
LA	umc1534	0.0373387
LA	umc1862	0.00996903
LA	phi96100	0.0428135
LA	umc1212	0.045429
LA	umc1707	0.0333619
LA	umc1883	0.0445835
LA	umc1031	0.0179853
LW	umc1503	0.01765
LW	bnlg1247	0.00317501
LW	umc1457	0.00342607
LW	bnlg2046	0.0346034
LW	umc1175	0.0324736
LW	umc2334	0.0358498
LW	umc1707	0.00204839
LW	umc1883	0.0172521
LW	umc2092	0.0324736
PH	umc1395	0.0157109
PH	bnlg1755	0.00446445
PH	umc1177	0.0326533
PH	umc1447	0.0259857
PH	umc2334	0.0218757
PH	umc1973	0.036394
PH	umc2280	0.0377288
PH	umc2198	0.0445205
PH	umc1072	0.0311823
PH	umc1271	0.0479061
PH	umc1707	0.0149335
PH	bnlg1176	0.0431749
PH	umc1883	0.0211988
PH	umc1519	0.0482477
PH	bnlg1617	0.00512778
PH	phi099	0.0424443
PH	umc1065	0.00568769
PH	bnlg1890	0.0293151
PH	umc1786	0.0349347
PH	bnlg125	0.0187175
RDW	umc1503	0.0303121
RDW	umc2266	0.0441353
RDW	bnlg238	0.0227017
RDW	umc2503	0.0024359
RDW	umc1868	0.0258108
RDW	umc1315	0.0230295
RDW	umc2059	0.0303121
RDW	bnlg1380	0.0451242
RDW	bnlg2082	0.0153099
RDW	umc2180	0.0216539
RDW	umc1491	0.0271243
RDW	umc1532	6.58418e-30
RDW	bnlg1615	0.0469735
RDW	umc1088	4.79327e-08
RDW	bnlg1237	0.0193135
RDW	umc1858	0.0495855
RDW	bnlg1117	0.0125935
RDW	umc1031	0.0466413
RDW	bnlg2190	0.0110904
RFW	umc1426	0.0114963
RFW	umc1503	0.000328963
RFW	umc2188	0.0164563
RFW	umc1015	0.0338619
RFW	umc1027	0.0378276
RFW	umc1221	0.00155525
RFW	umc1315	0.0267419
RFW	umc1457	0.00637137
RFW	umc2059	0.0235114
RFW	nc005	0.00517973
RFW	umc1862	0.0262338
RFW	umc2245	0.0191414
RFW	umc1608	0.0213969
RFW	umc1532	0.00228598
RFW	umc1159	0.0308489
RFW	bnlg1615	0.0488435
RFW	umc1883	0.0100816
RFW	bnlg1043	0.0227479
RFW	umc1031	0.0175952
RFW	bnlg1154	0.00997986
RFW	bnlg2190	0.00246895
RL	bnlg1200	0.0349682
RL	umc1366	0.0185678
RL	umc1653	0.0137737
RL	umc1695	0.000930765
RL	bnlg619	0.0126565
RL	bnlg238	0.00612417
RL	umc1166	0.0109247
RL	umc1741	0.0168972
RL	umc1055	0.00362395
RL	umc1747	0.0230275
RL	umc1490	0.043148
RL	phi116	0.0456717
RL	mmc0162	0.0334781
RL	umc2221	0.00299692
RL	umc1227	0.0365432
RL	bnlg2082	0.0199782
RL	umc1805	0.00768424
RL	umc1514	0.00114047
RL	umc2402	0.0171524
RL	umc2376	0.0444604
RL	umc1136	0.0055717
RL	umc2038	0.00818868
RL	umc1236	0.0133817
RL	umc1279	0.00805093
RL	phi427434	0.0361152
RL	umc1553	0.00943467
RL	umc1154	0.013223
RL	umc1846	0.0288968
RL	bnlg1617	0.00724574
RL	bnlg1892c	0.0174666
RL	bnlg1117	0.0092706
RL	umc2356	0.00362484
RL	umc1632	0.0316731
RL	bnlg1131	0.0244412
RL	bnlg1043	0.047891
RL	umc1065	0.0278681
RL	bnlg1154	0.0431361
RL	umc1079	0.0244159
RL	umc1823	0.0228957
SDW	umc1316	0.0490113
SDW	umc1503	0.0236813
SDW	umc1466	0.0446693
SDW	bnlg2241	0.0164661
SDW	umc1221	0.0429621
SDW	umc1457	0.00724872
SDW	bnlg2046	0.0393941
SDW	bnlg1126	0.00189454
SDW	umc2041	0.0399513
SDW	umc1532	0.0094587
SDW	umc1159	0.0250604
SDW	umc1716	0.0273241
SDW	bnlg1154	0.00192101
SDW	bnlg2190	0.000964535
SFW	umc1503	0.000390816
SFW	umc2188	0.0190375
SFW	umc2305	0.0235588
SFW	phi070	0.0103602
SFW	umc1221	0.00677142
SFW	umc1457	0.00728689
SFW	nc005	0.0216594
SFW	umc2325	0.0247218
SFW	bnlg2046	0.0162987
SFW	umc1175	0.00591425
SFW	umc1899	0.0204064
SFW	bnlg1126	0.03799
SFW	umc2380	0.047516
SFW	umc2245	0.0181742
SFW	umc1532	0.0191804
SFW	umc1159	0.038872
SFW	bnlg1615	0.0264262
SFW	umc1318	0.0169802
SFW	umc1883	0.00846395
SFW	umc1473	0.0212227
SFW	umc2092	0.00591425
SFW	umc1929	0.0334773
SFW	umc1031	0.0032249
SFW	bnlg2190	0.0219412
SFW	phi065	0.0418955
SW	umc1503	0.000382039
SW	umc1541	0.0441426
SW	umc2188	0.0176466
SW	umc1695	0.0207127
SW	umc2305	0.0249517
SW	phi070	0.00311641
SW	umc1221	0.0132003
SW	umc1747	0.0465281
SW	umc1457	0.01533
SW	nc005	0.00472228
SW	umc2325	0.0282925
SW	bnlg2046	0.0417519
SW	umc1175	0.00648011
SW	umc1899	0.0173612
SW	bnlg1126	0.0336258
SW	umc2380	0.0452757
SW	umc2245	0.0148203
SW	umc1532	0.0136257
SW	bnlg1615	0.0271764
SW	umc1318	0.00308503
SW	umc1883	0.00788193
SW	umc1473	0.0146374
SW	umc2092	0.00648011
SW	umc1929	0.0387488
SW	bnlg1043	0.0483209
SW	umc1031	0.00133421
SW	bnlg2190	0.0142654
SW	umc1084	0.0451191
TCC	umc1015	0.0445854
TCC	bnlg2162	0.0384661
TCC	umc1652	0.0165667
TCC	umc1295	0.0422584
TCC	umc1468	0.0269357
TCC	umc1852	0.0484528
